# Supplementary material for: Endovascular therapy in acute anterior circulation large vessel occlusive patients with a large infarct core (ANGEL-ASPECT): protocol of a multicentre randomised trial
Source: HighWire-hosted journal article supplement (doi:10.1136/svn-2022-001865), 2022-09-22
Supplement: svn-2022-001865supp001_data_supplement.pdf [file svn-2022-001865supp001_data_supplement.pdf]

## Supplemental tables

Supplemental table 1. Participation centers

| Department                                  | Hospital                                                                    | City      | Province       | Site PI            |
|---------------------------------------------|-----------------------------------------------------------------------------|-----------|----------------|--------------------|
| Department of Interventional Neuroradiology | Beijing Tiantan Hospital, Capital Medical University                        | Beijing   | Beijing        | Zhongrong Miao     |
| Department of Emergency                     | Xiangtan Central Hospital                                                   | Xiangtan  | Hunan          | Guangxiong Yuan    |
| Department of Neurology                     | Linyi People's Hospital                                                     | Linyi     | Shandong       | Hongxing Han       |
| Department of Neurology                     | Zhangzhou Affiliated Hospital of Fujian Medical University                  | Zhangzhou | Fujian         | Wenhua Chen        |
| Department of Neurosurgery                  | Tianjin huanhu hospital                                                     | Tianjin   | Tianjin        | Ming Wei           |
| Department of Neurology                     | Anyang People's Hospital                                                    | Anyang    | Henan          | Jiangang Zhang     |
| Department of Neurology                     | Yijishan Hospital of Wannan Medical College                                 | Wuhu      | Anhui          | Zhiming Zhou       |
| Department of Neurology                     | The first people's hospital of Chenzhou                                     | Chenzhou  | Hunan          | Xiaoxi Yao         |
| Department of Neurology                     | Binzhou People's Hospital                                                   | Binzhou   | Shandong       | Guoqing Wang       |
| Department of Neurology                     | Yancheng Third People's Hospital                                            | Yancheng  | Jiangsu        | Weigen Song        |
| Department of Neurology                     | Lishui Municipal Central Hospital                                           | Lishui    | Zhejiang       | Xueli Cai          |
| Department of Neurology                     | China-Japan Union Hospital of Jilin University                              | Changchun | Jilin          | Guangxian Nan      |
| Department of Neurointervention             | Dalian Municipal Central Hospital affiliated with Dalian Medical University | Dalian    | Liaoning       | Di Li              |
| Department of Neurosurgery                  | Guangdong Provincial Hospital of Chinese Medicine                           | Guangzhou | Guangdong      | Alvin Yi-Chou Wang |
| Department of Neurology                     | Zhongshan City People's Hospital                                            | Guangzhou | Guangdong      | Wentong Ling       |
| Department of Neurology                     | Shantou Central Hospital                                                    | Shantou   | Guangdong      | Chuwei Cai         |
| Department of Neurology                     | Nanyang Central Hospital                                                    | Nanyang   | Henan          | Changming Wen      |
| Department of Neurology                     | Taizhou hospital of Zhejiang Province                                       | Taizhou   | Zhejiang       | En Wang            |
| Department of Neurosurgery                  | Liaocheng People's Hospital                                                 | Liaocheng | Shandong       | Liyong Zhang       |
| Department of Neurology                     | Baotou Centre Hospital                                                      | Baotou    | Inner Mongolia | Changchun Jiang    |
| Department of Neurology                     | Shenzhen Hospital, Southern Medical University                              | Shenzhen  | Guangdong      | Yajie Liu          |
| Department of Neurology                     | Maoming People's Hospital                                                   | Maoming   | Guangdong      | Geng Liao          |
| Department of Neurology                     | The Second Affiliated Hospital of Guangzhou Medical University              | Guangzhou | Guangdong      | Xiaohui Chen       |

|                                                |                                                                                     |           |           |               |
|------------------------------------------------|-------------------------------------------------------------------------------------|-----------|-----------|---------------|
| Department of Cerebrovascular Disease          | Henan Provincial People's Hospital, Zhengzhou University                            | Zhengzhou | Henan     | Tianxiao Li   |
| Department of Neurology                        | Yongchuan Hospital of Chongqing Medical University                                  | Chongqing | Chongqing | Shudong Liu   |
| Department of Neurology                        | The affiliated hospital of South West medical university                            | Luzhou    | Sichuan   | Jinglun Li    |
| Department of Neurology                        | Shanxi Provincial People's Hospital                                                 | Taiyuan   | Shanxi    | Yaxuan Sun    |
| Department of Neurology                        | The Second Affiliated Hospital to Xiamen Medical College                            | Xiamen    | Fujian    | Na Xu         |
| Department of Neurology                        | Shengli Oilfield Central Hospital                                                   | Dongying  | Shandong  | Zong'en Gao   |
| Department of Neurology                        | Songyuan Jilin oil Field Hospital                                                   | Songyuan  | Jilin     | Dongsheng Ju  |
| Department of Interventional Neuroradiology    | Liao Cheng the third people's hospital                                              | Liaocheng | Shandong  | Cunfeng Song  |
| Department of Neurology                        | The First People's Hospital of Changzhou                                            | Changzhou | Jiangsu   | Jinggang Xuan |
| Department of Neurology                        | Taiyuan Central Hospital                                                            | Taiyuan   | Shanxi    | Feng Zhou     |
| Department of Neurology                        | Affiliated Jiangmen Traditional Chinese Medicine Hospital of Ji'nan University      | Jiangmen  | Guangdong | Qing Shi      |
| Department of Neurology                        | Sichuan Mianyang 404 Hospital                                                       | Mianyang  | Sichuan   | Jun Luo       |
| Department of Neurology                        | JingJiang People's Hospital, the Seventh Affiliated Hospital of Yangzhou University | Jingjiang | Jiangsu   | Yan Liu       |
| Department of Neurosurgery                     | Tianjin TEDA Hospital                                                               | Tianjin   | Tianjin   | Zaiyu Guo     |
| Department of Neurosurgery                     | The second Nanning People's Hospital                                                | Nanning   | Guangxi   | Tong Li       |
| Department of Neurology                        | West China Hospital, Sichuan University                                             | Chengdu   | Sichuan   | Hongbo Zheng  |
| Department of Neurosurgery                     | First Affiliated Hospital School of Medicine Shihezi University                     | Shihezi   | Xinjiang  | Linzhi Dai    |
| Department of Neurology                        | Siping Central People's Hospital                                                    | Siping    | Jilin     | Junfeng Zhao  |
| Emergency and Critical Stroke Ambulance Center | Langfang Changzheng Hospital                                                        | Langfang  | Hebei     | Liqiang Gui   |
| Department of Neurology                        | Beijing Luhe Hospital, Capital Medical University                                   | Beijing   | Beijing   | Xiaokun Geng  |
| Department of Neurology                        | Mianyang Central Hospital                                                           | Mianyang  | Sichuan   | Yufeng Tang   |
| Department of Neurology                        | Hangzhou First People's Hospital                                                    | Hangzhou  | Zhejiang  | Congguo Yin   |
| Department of Neurosurgery                     | The affiliated Hospital of Guizhou Medical University                               | Guiyang   | Guizhou   | Hua Yang      |

**Supplemental table 2. Study organization**

| Member                                  | Department                                         | Hospital                                                          |
|-----------------------------------------|----------------------------------------------------|-------------------------------------------------------------------|
| <b>Steering Committee</b>               |                                                    |                                                                   |
| Yongjun Wang                            | Department of Neurology                            | Beijing Tiantan Hospital, Capital Medical University              |
| Yilong Wang                             | Department of Neurology                            | Beijing Tiantan Hospital, Capital Medical University              |
| Liping Liu                              | Department of Neurology                            | Beijing Tiantan Hospital, Capital Medical University              |
| David S. Liebeskind                     | Department of Neurology                            | University of California at Los Angeles                           |
| Zhongrong Miao                          | Department of Interventional Neuroradiology        | Beijing Tiantan Hospital, Capital Medical University              |
| Zeguang Ren                             | Department of Neurosurgery                         | The Affiliated Hospital of Guizhou Medical University             |
| Vitor Mendes Pereira                    | Department of Neurosurgery, Division of Surgery    | St Michael's Hospital, University of Toronto                      |
| <b>Independent imaging Core Lab</b>     |                                                    |                                                                   |
| Jing Jing                               | Tiantan Neuroimaging Center of Excellence (T-NICE) | China National Clinical Research Center for Neurological Diseases |
| Zhe Zhang                               | Tiantan Neuroimaging Center of Excellence (T-NICE) | China National Clinical Research Center for Neurological Diseases |
| Yingkui Zhang                           | Tiantan Neuroimaging Center of Excellence (T-NICE) | China National Clinical Research Center for Neurological Diseases |
| Wei Wu                                  | Department of Neurology                            | Qilu Hospital, Shandong University                                |
| <b>Data safety and monitoring board</b> |                                                    |                                                                   |
| Jianmin Liu                             | Neurovascular Center                               | Changhai Hospital, Naval Medical University                       |
| Chen Yao                                | Department of Medical Statistics                   | Peking University First Hospital                                  |
| Kangning Chen                           | Department of Neurology                            | The Southwest Hospital of Army Medical University                 |
| <b>Clinical event committee</b>         |                                                    |                                                                   |
| Kun Fang                                | Department of Neurology                            | Huashan Hospital, Fudan University                                |
| Bo Song                                 | Department of Neurology                            | The First Affiliated Hospital of Zhengzhou University             |
| Yi Dong                                 | Department of Neurology                            | Huashan Hospital, Fudan University                                |
| <b>Executive committee</b>              |                                                    |                                                                   |
| Zhongrong Miao                          | Department of Interventional Neuroradiology        | Beijing Tiantan Hospital, Capital Medical University              |

|                 |                                             |                                                                             |
|-----------------|---------------------------------------------|-----------------------------------------------------------------------------|
| Xiaochuan Huo   | Department of Interventional Neuroradiology | Beijing Tiantan Hospital, Capital Medical University                        |
| Gaoting Ma      | Department of Interventional Neuroradiology | Beijing Tiantan Hospital, Capital Medical University                        |
| Guangxiong Yuan | Department of Emergency                     | Xiangtan Central Hospital                                                   |
| Hongxing Han    | Department of Neurology                     | Linyi People's Hospital                                                     |
| Wenhua Chen     | Department of Neurology                     | Zhangzhou Affiliated Hospital of Fujian Medical University                  |
| Ming Wei        | Department of Neurosurgery                  | Tianjin huanhu hospital                                                     |
| Jiangang Zhang  | Department of Neurology                     | Anyang People's Hospital                                                    |
| Zhiming Zhou    | Department of Neurology                     | Yijishan Hospital of Wannan Medical College                                 |
| Xiaoxi Yao      | Department of Neurology                     | Chenzhou First One Hospital                                                 |
| Guoqing Wang    | Department of Neurology                     | Bin zhou People's Hospital                                                  |
| Weigen Song     | Department of Neurology                     | Yancheng Third People's Hospital                                            |
| Xueli Cai       | Department of Neurology                     | Lishui Municipal Central Hospital                                           |
| Guangxian Nan   | Department of Neurology                     | China-Japan Union Hospital of Jilin University                              |
| Di Li           | Department of Neurointervention             | Dalian Municipal Central Hospital affiliated with Dalian Medical University |
| Yizhou Wang     | Department of Neurosurgery                  | Guangdong Provincial Hospital of Chinese Medicine                           |
| Wentong Ling    | Department of Neurology                     | ZhongShan City People's Hospital                                            |
| Chuwei Cai      | Department of Neurology                     | Shantou Central Hospital                                                    |
| Changming Wen   | Department of Neurology                     | Nanyang Central Hospital                                                    |
| En Wang         | Department of Neurology                     | Taizhou hospital of Zhejiang Province                                       |
| Liyong Zhang    | Department of Neurosurgery                  | Liaocheng People's Hospital                                                 |
| Changchun Jiang | Department of Neurology                     | Baotou Centre Hospital                                                      |
| Yajie Liu       | Department of Neurology                     | Shenzhen Hospital, Southern Medical University                              |
| Geng Liao       | Department of Neurology                     | Maoming People's Hospital                                                   |
| Xiaohui Chen    | Department of Neurology                     | The Second Affiliated Hospital of GuangZhou Medical University              |
| Tianxiao Li     | Department of Cerebrovascular Disease       | Henan Provincial People's Hospital, Zhengzhou University                    |
| Shudong Liu     | Department of Neurology                     | Yongchuan Hospital of Chongqing Medical University                          |
| Jinglun Li      | Department of Neurology                     | The affiliated hospital of South West medical                               |

|               |                                                |                                                                                     |
|---------------|------------------------------------------------|-------------------------------------------------------------------------------------|
|               |                                                | university                                                                          |
| Yaxuan Sun    | Department of Neurology                        | Shanxi Provincial People's Hospital                                                 |
| Na Xu         | Department of Neurology                        | The Second Affiliated Hospital to Xiamen Medical College                            |
| Zong'en Gao   | Department of Neurology                        | Shengli Oilfield Central Hospital                                                   |
| Dongsheng Ju  | Department of Neurology                        | Songyuan Jilin oil Field Hospital                                                   |
| Cunfeng Song  | Department of Interventional Neuroradiology    | Liao Cheng the third people's hospital                                              |
| Jinggang Xuan | Department of Neurology                        | The First People's Hospital of Changzhou                                            |
| Feng Zhou     | Department of Neurology                        | Taiyuan Central Hospital                                                            |
| Qing Shi      | Department of Neurology                        | Affiliated Jiangmen Traditional Chinese Medicine Hospital of Ji'nan University      |
| Jun Luo       | Department of Neurology                        | Sichuan Mianyang 404 Hospital                                                       |
| Yan Liu       | Department of Neurology                        | JingJiang People's Hospital, the Seventh Affiliated Hospital of Yangzhou University |
| Zaiyu Guo     | Department of Neurosurgery                     | Tianjin TEDA Hospital                                                               |
| Tong Li       | Department of Neurosurgery                     | The second Nanning People's Hospital                                                |
| Hongbo Zheng  | Department of Neurology                        | West China Hospital, Sichuan University                                             |
| Linshi Dai    | Department of Neurosurgery                     | First Affiliated Hospital School of Medicine Shihezi University                     |
| Junfeng Zhao  | Department of Neurology                        | Siping Central People's Hospital                                                    |
| Liqiang Gui   | Emergency and Critical Stroke Ambulance Center | Langfang Changzheng Hospital                                                        |
| Xiaokun Geng  | Department of Neurology                        | Beijing Luhe Hospital, Capital Medical University                                   |
| Yufeng Tang   | Department of Neurology                        | Mianyang Central Hospital                                                           |
| Congguo Yin   | Department of Neurology                        | Hangzhou First People's Hospital                                                    |
| Hua Yang      | Department of Neurology                        | The affiliated Hospital of Guizhou Medical University                               |

Supplemental table 3. Registered Large infarct core volume thrombectomy trials

| Trial                                   | TENSION                  | LASTE                                     | TESLA                | RESCUE - Japan LIMIT                  | SELECT - 2                                                                                                                  | ANGEL - ASPECT                                                                                      |
|-----------------------------------------|--------------------------|-------------------------------------------|----------------------|---------------------------------------|-----------------------------------------------------------------------------------------------------------------------------|-----------------------------------------------------------------------------------------------------|
| <b>NCT number</b>                       | NCT03094715              | NCT03811769                               | NCT03805308          | NCT03702413                           | NCT03876457                                                                                                                 | NCT04551664                                                                                         |
| <b>Participating Country(ies)</b>       | Europe, Canada           | Europe, United States                     | United States        | Japan                                 | United States, Canada, Europe                                                                                               | China                                                                                               |
| <b>Major imaging inclusion criteria</b> | NCT or DWI ASPECTS 3 - 5 | NCT or DWI ASPECTS 0 - 5 (4-5 for > 80 y) | NCT or ASPECTS 2 - 5 | CT ASPECTS 3 - 5 or DWI ASPECTS 3 - 5 | 1. ASPECTS $\geq 6$ and CTP core $\geq 50$ cc<br>2. ASPECTS 3 - 5 and core $\geq 50$ cc<br>3. ASPECTS 3 - 5 and core <50 cc | 1. ASPECTS 3 - 5<br>2. ASPECTS >5 (>6 h) and core 70 - 100 cc<br>3. ASPECTS <3 and core 70 - 100 cc |

| Trial                                              | TENSION                                                                                                                | LASTE                                                                                                                                                                      | TESLA                                                                                                             | RESCUE - Japan LIMIT                                                                                                                          | SELECT - 2                                                                                                                                                       | ANGEL - ASPECT                                                                                                                           |
|----------------------------------------------------|------------------------------------------------------------------------------------------------------------------------|----------------------------------------------------------------------------------------------------------------------------------------------------------------------------|-------------------------------------------------------------------------------------------------------------------|-----------------------------------------------------------------------------------------------------------------------------------------------|------------------------------------------------------------------------------------------------------------------------------------------------------------------|------------------------------------------------------------------------------------------------------------------------------------------|
| NIHSS score                                        | <26                                                                                                                    | >5                                                                                                                                                                         | >6                                                                                                                | ≥6                                                                                                                                            | ≥6                                                                                                                                                               | 6-30                                                                                                                                     |
| Age, y                                             | >18                                                                                                                    | ≥18                                                                                                                                                                        | 18-85                                                                                                             | >18                                                                                                                                           | 18-85                                                                                                                                                            | 18-80                                                                                                                                    |
| Time window                                        | <12 h LSW                                                                                                              | <6.5 h LKW                                                                                                                                                                 | Random <24 h                                                                                                      | Random <6 h LKW, 6-24 FLAIR (-)                                                                                                               | Treat <24 h (0-12 vs 6-24)                                                                                                                                       | Random <24 h                                                                                                                             |
| Occlusion site                                     | Terminal ICA and MCA M1                                                                                                | Intracranial ICA, MCA M1 or M1-M2                                                                                                                                          | Terminal ICA and M1                                                                                               | Terminal ICA and M1                                                                                                                           | ICA or MCA M1, tandem                                                                                                                                            | Terminal ICA and/or MCA M1<br>Tandem occlusion included                                                                                  |
| Required time limit from randomization to puncture | No                                                                                                                     | Yes<br>Randomization to arterial access<br>30 min                                                                                                                          | No                                                                                                                | Yes<br>Randomization to arterial access<br>60 min                                                                                             | No                                                                                                                                                               | Yes<br>Randomization to arterial access<br>60 min                                                                                        |
| Bridging therapy permitted                         | Yes                                                                                                                    | Yes                                                                                                                                                                        | Yes                                                                                                               | Yes                                                                                                                                           | Yes                                                                                                                                                              | Yes                                                                                                                                      |
| Intervention model                                 | EVT, no specified device                                                                                               | EVT, no specified device                                                                                                                                                   | FDA-approved EVT devices                                                                                          | EVT, no specified device                                                                                                                      | EVT with SR<br>Device: Trevo, Solitaire, and EmboTrap                                                                                                            | EVT, IA-thrombolysis, angioplasty<br>Device: Solitaire, EMBOTRAP, Reco SR, Penumbra aspiration catheter, or CFDA-approved EVT devices    |
| Major exclusion criteria                           | Mass effect on CT<br>Vascular disease prevent MT (eg, aortic dissection or aneurysm, no arterial trans femoral access) | Suspicion of aortic dissection, excessive tortuosity of cervical vessels on vascular imaging<br>Multiple occlusion<br>Cervical tandem lesion that requires stent placement | Refractory hypertension<br>Mass effect on CT<br>Tandem lesion<br>Difficult endovascular access on vascular images | Mass effect on CT<br>Clinical evidence of chronic occlusion<br>High risk of hemorrhage (platelet <40,000/ $\mu$ L, APTT >50 s or PT-INR >3.0) | Mass effect on CT<br>Inability to undergo CTA and/or CTP<br>tPA 3-4.5 h<br>With special situation*<br>ICA dissection or aortic dissection<br>Multiple occlusions | Refractory hypertension<br>Mass effect on CT<br>Multiple occlusions<br>INR >1.7 or APTT >35 s;<br>platelet count <100×10 <sup>9</sup> /L |
| Primary outcome                                    | mRS score shift analysis                                                                                               | mRS score at 90 and 180 d                                                                                                                                                  | Utility-weighted 90-d mRS score                                                                                   | mRS score 0-3 at 90 d                                                                                                                         | Shift on 90-d mRS score                                                                                                                                          | mRS score at 90 d                                                                                                                        |
| Actual study start date                            | July 20, 2018                                                                                                          | April 7, 2019                                                                                                                                                              | July 16, 2019                                                                                                     | November 2018                                                                                                                                 | October 11, 2019                                                                                                                                                 | September 28, 2020                                                                                                                       |

Source: <https://clinicaltrials.gov>. ANGEL-ASPECT, Study of EVT in Acute Anterior Circulation LVO Patients with a large infarCT core; Core: rCBF <30% on CT perfusion or ADC <620. ADC indicates apparent diffusion coefficient; APTT, activated partial thromboplastin time; ASPECTS, Alberta Stroke Program Early CT Score; CFDA, China Food and Drug Administration; CT, computed tomography; CTA, computed tomography angiography; CTP, computed tomography perfusion; DWI, diffusion-weighted imaging; EVT, endovascular treatment; FDA, US Food and Drug Administration; FLAIR, fluid-attenuated inversion recovery; IA, intra-arterial; ICA, internal carotid artery; INR, international normalized ratio; LASTE, Large Stroke Therapy Evaluation; LKW, last known well; LSW, last seen well; LVO, large vessel occlusion; MCA, middle cerebral artery; mRS, modified Rankin Scale; MT, mechanical thrombectomy; NCCT, noncontrast CT; NCT, National Clinical Trial; NIHSS, National Institutes of Health Stroke Scale; PT-INR, Pro-thrombin Time-International Normalized Ratio; RESCU-Japan LIMIT, Randomized Controlled Trial of Endovascular Therapy for Acute Large Vessel Occlusion With Large Ischemic Core; rCBF, relative cerebral blood flow; SELECT-2, Thrombectomy for Emergent Salvage of Large Anterior Circulation Ischemic Stroke; SR, stent retriever; TESLA, Thrombectomy for Emergent Salvage of Large Anterior Circulation Ischemic Stroke and tPA, tissue plasminogen activator.

\* (1) Age >80 y, (2) current anticoagulant use, (3) history of diabetes and prior stroke, (4) NIHSS >25, and (5) ischemic involvement of more than one-third of MCA territory.
